# Supplementary material for: Selective recognition of 2,4,5-trichlorophenol by temperature responsive and magnetic molecularly imprinted polymers based on halloysite nanotubes
Source: Royal Society of Chemistry journal article supplement (doi:10.1039/c1jm14825g), 2012-01-01
Supplement: c1jm14825g.pdf [file c1jm14825g.pdf]

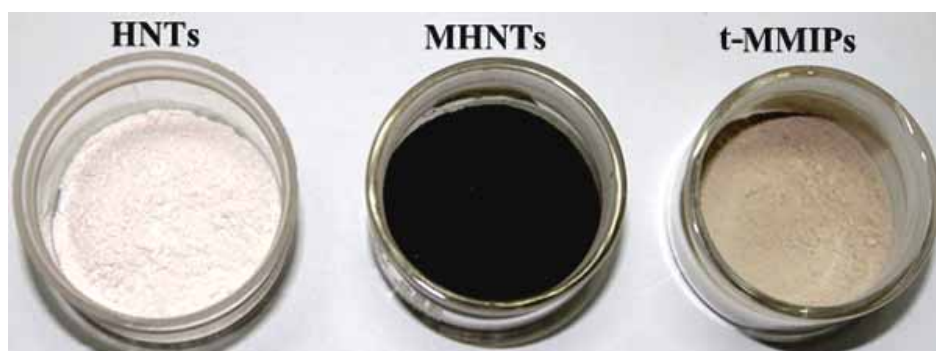

Figure ES11 Photographs of HNTs, MHNTs and t-MMIPs.

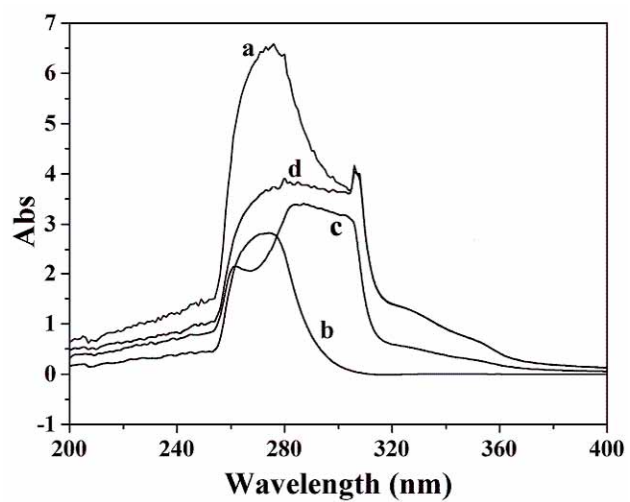

Figure ESI2 Ultraviolet absorption spectra of the TCP (a), MAA(b), TCP-MAA complex(c), and theoretical sum of TCP and MAA (d) in DMSO solution.
